# Supplementary material for: Engineering the interface in mechanically responsive graphene-based films
Source: Royal Society of Chemistry journal article supplement (doi:10.1039/c8ra07974a), 2018-01-01
Supplement: c8ra07974a1.pdf [file c8ra07974a1.pdf]

***Supporting information to***

**Engineering the Interface in Mechanically Responsive  
Graphene-Based Films**

Yaqing Chen<sup>1,2</sup>, Zhaohe Dai<sup>1</sup>, Chuanxin Weng<sup>1,2</sup>, Guorui Wang<sup>1</sup>, Xuelu Liu<sup>3</sup>, Xin  
Cong<sup>3</sup>, Pingheng Tan<sup>3</sup>, Luqi Liu<sup>\*,1</sup> and Zhong Zhang<sup>\*,1</sup>

<sup>1</sup> CAS Key Laboratory of Nanosystem and Hierarchical Fabrication, CAS Center for  
Excellence in Nanoscience, National Center for Nanoscience and Technology,  
Beijing, 100190, People's Republic of China

<sup>2</sup>University of Chinese Academy of Science, Beijing 100049, People's Republic of  
China

<sup>3</sup>State Key Laboratory of Superlattices and Microstructures, Chinese Academy of  
Sciences, Beijing 100083, People's Republic of China

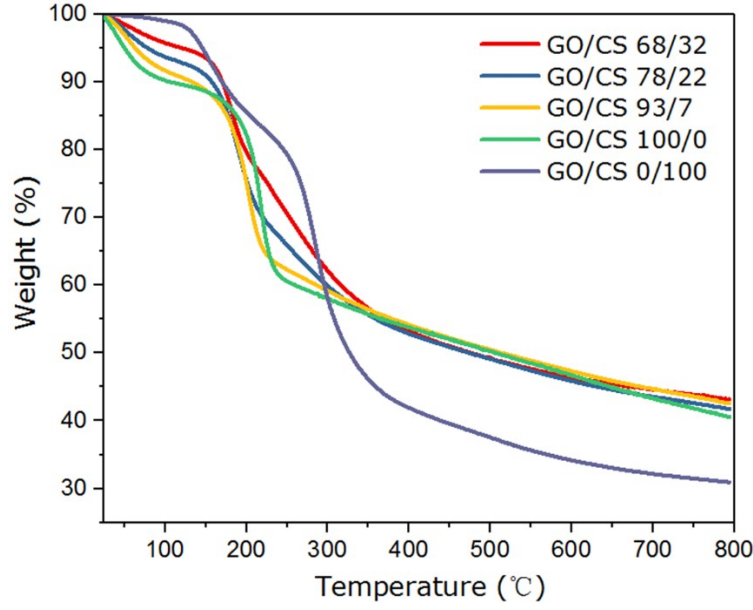

Fig. S1 TGA curves of GO/CS nanocomposite films with a heating rate of 10 °C/min under nitrogen atmosphere. Considering the weight loss before 105 °C is mainly due to water evaporating and both GO and CS have all degradation peaks before 500 °C, temperature ranging from 105 °C to 500 °C is chosen to calculate the GO weight fraction of GO/CS nanocomposites.

The calculation of GO weight percent ( $w$ ) in GO/CS nanocomposites is decided by equation<sup>1</sup> S1:

$$w = \frac{M - M_{CS}}{M_{GO} - M_{CS}} \times 100\% \quad (S1)$$

$w$  represents the GO weight percent;  $M$ ,  $M_{GO}$  and  $M_{CS}$  are weight losses of GO/CS composites between 105 °C to 500 °C, respectively.

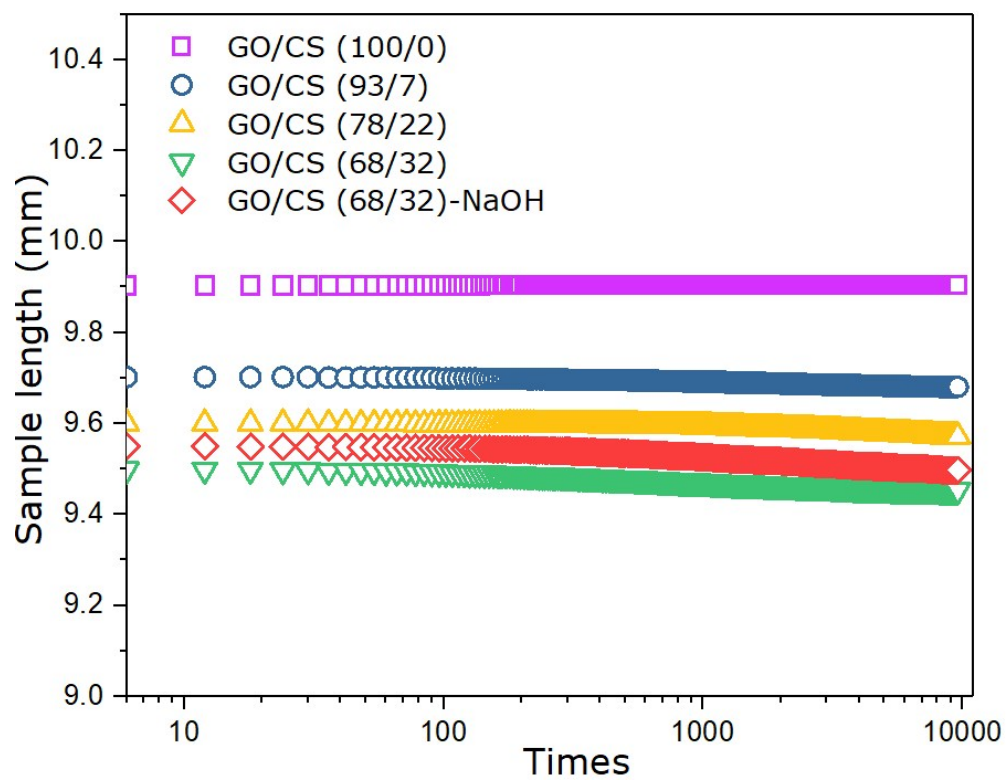

Fig. S2 Length changes of a series of GO/CS nanocomposite films with different weight ratios (100/0, 93/7, 78/22, 68/32) and alkali treated GO/CS (68/32) films during dynamic tension.

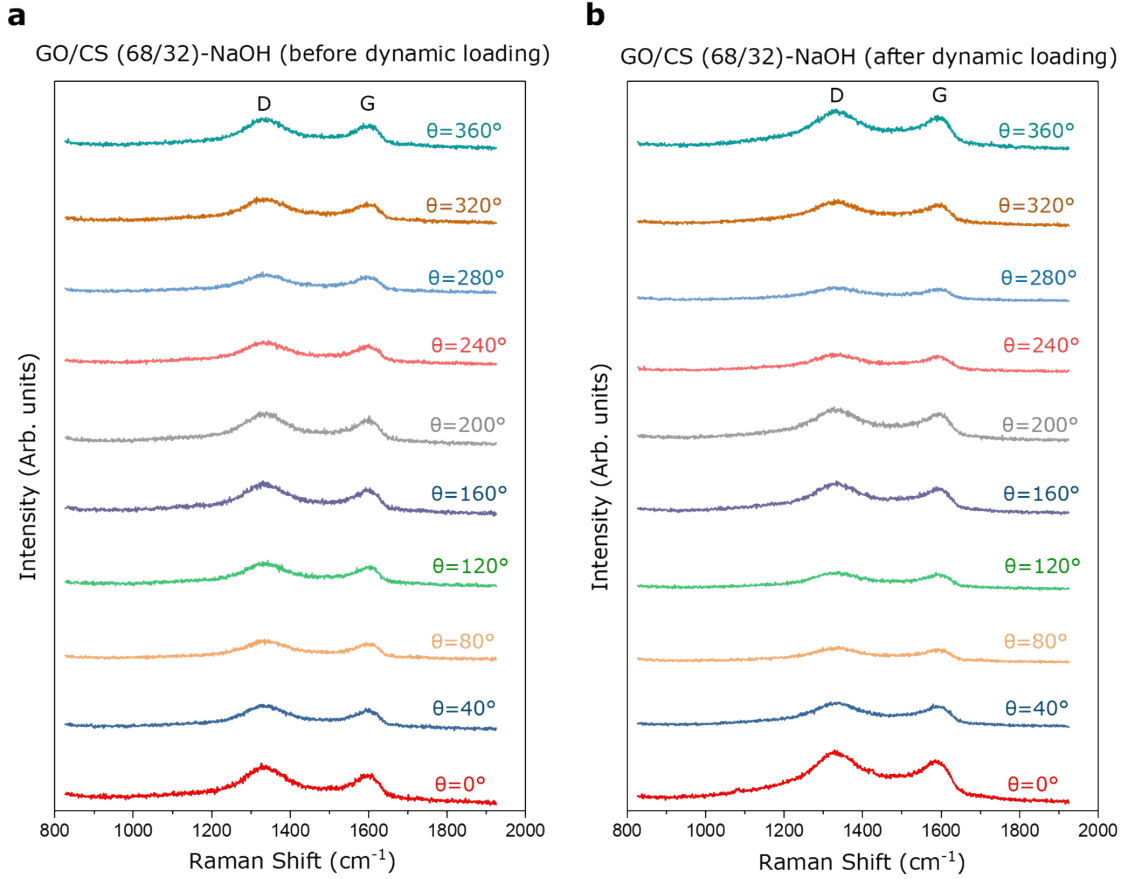

Fig. S3 Raman spectra of alkali treated GO/CS (68/32) films with varying polarization angles ( $\theta$ ) of incident laser for samples (a) before dynamic loading and (b) after dynamic loading. It is acknowledged that<sup>13</sup>

$$I_G(\alpha) = \frac{1}{2} c^2 \cos^2 \alpha \left\{ 2 + \cos [2(\alpha - \theta)] + \cos [2(\alpha + \theta)] \right\} \quad (S2)$$

$I_G$  reaches a maximum value  $I_G(\parallel)$  when the electric field vector is parallel to the base plane of the GO/CS (68/32)-NaOH film ( $\theta=0^\circ$  and  $180^\circ$ ), while arrives at a minimum value  $I_G(\perp)$  when perpendicular to the base plane ( $\theta=90^\circ$  and  $270^\circ$ ).  $I_G(\parallel)/I_G(\perp)$  is equal to  $\cot^2 \alpha$ , indicating a decreasing  $\alpha$  with an increasing ration of  $I_G(\parallel)/I_G(\perp)$ .

Table S1. The detailed peak information from XPS spectra of untreated and alkali treated GO and GO/CS films.

| Functional groups  | C1s                |                  |                  |                  |                  | N1s                  |                  |                                   |
|--------------------|--------------------|------------------|------------------|------------------|------------------|----------------------|------------------|-----------------------------------|
|                    | C in graphite (eV) | C-N (eV)         | C-O (eV)         | C=O (eV)         | C(O)O (eV)       | NH <sub>2</sub> (eV) | O=C-N (eV)       | NH <sub>3</sub> <sup>+</sup> (eV) |
| GO                 | 284.7<br>(52.7%)   | ---              | 286.8<br>(25.5%) | 287.3<br>(10.6%) | 288.6<br>(11.2%) | ---                  | ---              | ---                               |
| GO-NaOH            | 284.7<br>(72.6%)   | ---              | 286.4<br>(17.2%) | 288.2<br>(10.2%) | ---              | ---                  | ---              | ---                               |
| GO/CS (68/32)      | 284.8<br>(39.6%)   | 286.2<br>(18.1%) | 286.8<br>(20.4)  | 287.8<br>(15.3%) | 288.3<br>(6.6%)  | 399.3<br>(53.6%)     | 399.9<br>(30.6%) | 401.7<br>(15.8%)                  |
| GO/CS (68/32)-NaOH | 284.7<br>(52.0%)   | 285.8<br>(14.6%) | 286.4<br>(27.1%) | 288.2<br>(6.3%)  | ---              | 399.7<br>(92.1%)     | 400.1<br>(7.9%)  | ---                               |

Table S2. The mechanical properties of alkali treated GO-based films in our work and other GO-based nanocomposites reported in literatures.<sup>1-12</sup>

| Materials                 | Modulus (GPa) | Stress (MPa) | Toughness (MJ/m <sup>3</sup> ) | Reference |
|---------------------------|---------------|--------------|--------------------------------|-----------|
| rGO-CS                    | 6.5           | 526.7        | 17.7                           | 1         |
| GO-GA                     | 30.0          | 101.0        | 0.3                            | 2         |
| GO-Ca <sup>2+</sup>       | 28.1          | 125.8        | 0.3                            | 3         |
| GO-Mg <sup>2+</sup>       | 27.9          | 80.6         | 0.2                            | 3         |
| GO-Al <sup>3+</sup>       | 26.2          | 100.5        | 0.2                            | 4         |
| GO-PMMA                   | 7.5           | 148.3        | 2.4                            | 5         |
| GO-PVA                    | 10.4          | 188.9        | 2.5                            | 5         |
| rGO-PAPB                  | 7.17          | 382.0        | 7.5                            | 7         |
| rGO-MoS <sub>2</sub> -TPU | 10.0          | 235.0        | 6.9                            | 8         |
| rGO-SL                    | 26.0          | 300.0        | 0.8                            | 9         |
| rGO-MMT-PVA               | 2.5.0         | 356.0        | 7.4                            | 10        |
| GO-MMT-PVA                | 16.0          | 263.0        | 7.5                            | 10        |
| rGO-DWNTs-PVA             | 6.0           | 375.8        | 11.3                           | 11        |
| rGO-PCDO-NFC              | 2.5           | 314.6        | 9.8                            | 12        |
| GO                        | 9.4±0.8       | 67.0±9.8     | 0.3±0.1                        | This work |
| GO/CS                     | 12.7±1.3      | 170.7±15.2   | 2.8±0.3                        | This work |
| GO/CS-NaOH                | 20.9±3.5      | 316.0±31.7   | 6.0±0.9                        | This work |
| GO/CS-NaOH stressed       | 35.1±4.2      | 614.0±36.6   | 9.3±1.7                        | This work |

## References

- (1) Wan, S.; Peng, J.; Li, Y.; Hu, H.; Jiang, L.; Cheng, Q. Use of Synergistic Interactions to Fabricate Strong, Tough, and Conductive Artificial Nacre Based on Graphene Oxide and Chitosan. *ACS Nano* **2015**, *9* (10), 9830-9836.
- (2) Gao, Y.; Liu, L.-Q.; Zu, S.-Z.; Peng, K.; Zhou, D.; Han, B.-H.; Zhang, Z. The Effect of Interlayer Adhesion on the Mechanical Behaviors of Macroscopic Graphene Oxide Papers. *ACS Nano* **2011**, *5* (3), 2134-2141.
- (3) Park, S.; Lee, K.-S.; Bozoklu, G.; Cai, W.; Nguyen, S. T.; Ruoff, R. S. Graphene Oxide papers Modified by Divalent Ions-Enhancing Mechanical Properties via Chemical Cross-Linking. *ACS Nano* **2008**, *2* (3), 572-578.
- (4) Yeh, C. N.; Raidongia, K.; Shao, J.; Yang, Q. H.; Huang, J. On the Origin of the Stability of Graphene Oxide Membranes in Water. *Nat. Chem.* **2014**, *7* (2), 166-170.
- (5) Putz, K. W.; Compton, O. C.; Palmeri, M. J.; Nguyen, S. T.; Brinson, L. C. High-Nanofiller-Content Graphene Oxide Polymer Nanocomposites via Vacuum-Assisted Self-Assembly. *Adv. Funct. Mater.* **2010**, *20* (19), 3322-3329.
- (6) Li, Y. Q.; Yu, T.; Yang, T. Y.; Zheng, L. X.; Liao, K. Bio-Inspired Nacre-like Composite Films Based on Graphene with Superior Mechanical, Electrical, and Biocompatible Properties. *Adv. Mater.* **2012**, *24* (25), 3426-3431.
- (7) Tian, Y.; Cao, Y.; Wang, Y.; Yang, W.; Feng, J. Realizing Ultrahigh Modulus and High Strength of Macroscopic Graphene Oxide Papers through Crosslinking of Mussel-Inspired Polymers. *Adv. Mater.* **2013**, *25* (21), 2980-2983.
- (8) Wan, S.; Li, Y.; Peng, J.; Hu, H.; Cheng, Q.; Jiang, L. Synergistic Toughening of Graphene Oxide–Molybdenum Disulfide–Thermoplastic Polyurethane Ternary Artificial Nacre. *ACS Nano* **2015**, *9* (1), 708-714.
- (9) Hu, K.; Tolentino, L. S.; Kulkarni, D. D.; Ye, C.; Kumar, S.; Tsukruk, V. V. Written-in Conductive Patterns on Robust Graphene Oxide Biopaper by Electrochemical Microstamping. *Angew. Chem. Int. Ed.* **2013**, *52* (51), 13784-13788.
- (10) Ming, P.; Song, Z.; Gong, S.; Zhang, Y.; Duan, J.; Zhang, Q.; Jiang, L.; Cheng, Q. Nacre-Inspired Integrated Nanocomposites with Fire Retardant Properties by Graphene Oxide and Montmorillonite. *J. Mater. Chem. A* **2015**, *3* (42), 21194-21200.
- (11) Gong, S.; Cui, W.; Zhang, Q.; Cao, A.; Jiang, L.; Cheng, Q. Integrated Ternary Bioinspired Nanocomposites via Synergistic Toughening of Reduced Graphene Oxide and Double-Walled Carbon Nanotubes. *ACS Nano* **2015**, *9* (12), 11568-11573.

- (12) Duan, J.; Gong, S.; Gao, Y.; Xie, X.; Jiang, L.; Cheng, Q. Bioinspired Ternary Artificial Nacre Nanocomposites Based on Reduced Graphene Oxide and Nanofibrillar Cellulose. *ACS Appl. Mater. Interfaces* **2016**, 8 (16), 10545-10550.
- (13) Dai, Z.; Wang, Y.; Liu, L.; Liu, X.; Tan, P.; Xu, Z.; Kuang, J.; Liu, Q.; Lou, J.; Zhang, Z. Hierarchical Graphene-Based Films with Dynamic Self-Stiffening for Biomimetic Artificial Muscle. *Adv. Funct. Mater.* **2016**, 26 (38), 7003-7010.
